# Supplementary material for: Genetic and phenotypic characterization of recently discovered enterovirus D type 111
Source: PubMed Central journal article supplement (PMC6818792; doi:10.1371/journal.pntd.0007797), 2019-10-17
Supplement: pntd.0007797.s001.pdf [file pntd.0007797.s001.pdf]

| <b>Cell line</b> | <b>Component (Final concentration)</b>                                                                                     | <b>Provider</b>                  | <b>Reference</b>                             |
|------------------|----------------------------------------------------------------------------------------------------------------------------|----------------------------------|----------------------------------------------|
| RD               | Minimum Essential Medium Eagle<br>HEPES (10 mM)<br>Foetal Bovine Serum (5%)<br>Glutamine (2 mM)                            | Sigma<br>Gibco<br>Gibco<br>Gibco | M5650<br>15630-056<br>10270-098<br>25030-081 |
| L20B             | Minimum Essential Medium Eagle<br>HEPES (10 mM)<br>Foetal Bovine Serum (10%)<br>Glutamine (2 mM)                           | Sigma<br>Gibco<br>Gibco<br>Gibco | M5650<br>15630-056<br>10270-098<br>25030-081 |
| HEp-2c           | Minimum Essential Medium Eagle<br>Foetal Bovine Serum (10%)<br>Glutamine (2 mM)                                            | Sigma<br>Gibco<br>Gibco          | M5650<br>10270-098<br>25030-081              |
| LLC-MK2          | Medium 199<br>Heat Inactivated Horse Serum (1%)<br>Glutamine (2 mM)                                                        | Gibco<br>Gibco<br>Gibco          | 31150-022<br>26050-070<br>25030-081          |
| MA104            | Minimum Essential Medium Eagle<br>Foetal Bovine Serum (10%)<br>Glutamine (2 mM)<br>Non-Essential Amino Acids Solution (1X) | Sigma<br>Gibco<br>Gibco<br>Gibco | M5650<br>10270-098<br>25030-081<br>11140-035 |
| L                | DMEM High Glucose<br>Foetal Bovine Serum (10%)<br>Glutamine (2 mM)                                                         | Gibco<br>Gibco<br>Gibco          | 11965-092<br>26050-070<br>25030-081          |
| D171 hybridoma   | RPMI 1640<br>Heat Inactivated Foetal Bovine Serum (10%)<br>Glutamine (2 mM)                                                | Lonza<br>Gibco<br>Gibco          | BE12-167F<br>10500-056<br>25030-081          |
| C6/36            | Leibovitz's L-15 Medium<br>Foetal Bovine Serum (10%)<br>Non-Essential Amino Acids Solution (1X)                            | Gibco<br>Gibco<br>Gibco          | 11415-049<br>26050-070<br>11140-035          |
