# Supplementary material for: Genetic and phenotypic characterization of recently discovered enterovirus D type 111
Source: PubMed Central journal article supplement (PMC6818792; doi:10.1371/journal.pntd.0007797), 2019-10-17
Supplement: pntd.0007797.s002.pdf [file pntd.0007797.s002.pdf]

|                | <b>NGB-06-107</b>             | <b>TOK-230</b>                | <b>BAN-06-150</b>             | <b>OUP-05-059</b>             | <b>Nigeria-2017</b>           |
|----------------|-------------------------------|-------------------------------|-------------------------------|-------------------------------|-------------------------------|
| <b>VP4/VP2</b> | AP <b>I</b> LK/SPSAE          | AP <b>V</b> LK/SPSAE          | AP <b>V</b> LK/SPSAE          | AP <b>V</b> LK/SPSAE          | not sequenced                 |
| <b>VP2/VP3</b> | NAITQ/GVPTY                   | NAITQ/GVPTY                   | NAITQ/GVPTY                   | NAITQ/GVPTY                   | not sequenced                 |
| <b>VP3/VP1</b> | PDIGQ/SKILP                   | PDIGQ/SKILP                   | PDIGQ/SKILP                   | PDIGQ/SKILP                   | not sequenced                 |
| <b>VP1/2A</b>  | SLT <b>T</b> R/GPG <b>F</b> G | SLT <b>T</b> R/GPG <b>Y</b> G | SLT <b>T</b> R/GPG <b>F</b> G | SLT <b>T</b> R/GPG <b>F</b> G | SLT <b>S</b> K/GPG <b>F</b> G |
| <b>2A/2B</b>   | <b>E</b> AMEQ/GITDY           | <b>D</b> AMEQ/GITDY           | <b>D</b> AMEQ/GITDY           | <b>D</b> AMEQ/GITDY           | <b>E</b> AMEQ/GITDY           |
| <b>2B/2C</b>   | YVI <b>K</b> Q/GDSWL          | YVI <b>K</b> Q/GDSWL          | YVI <b>R</b> Q/GDSWL          | YVI <b>R</b> Q/GDSWL          | YVI <b>K</b> Q/GDSWL          |
| <b>2C/3A</b>   | EALFQ/GPPQF                   | EALFQ/GPPQF                   | EALFQ/GPPQF                   | EALFQ/GPPQF                   | EALFQ/GPPQF                   |
| <b>3A/3B</b>   | FAG <b>M</b> Q/GPYTG          | FAG <b>M</b> Q/GPYTG          | FAG <b>I</b> Q/GPYTG          | FAG <b>I</b> Q/GPYTG          | not sequenced                 |
| <b>3B/3C</b>   | <b>T</b> AKVQ/GPGFD           | <b>V</b> AKVQ/GPGFD           | <b>T</b> AKVQ/GPGFD           | <b>T</b> AKVQ/GPGFD           | not sequenced                 |
| <b>3C/3D</b>   | FT <b>G</b> KQ/GEIVS          | FT <b>D</b> KQ/GEIVS          | FT <b>D</b> KQ/GEIVS          | FT <b>N</b> KQ/GEIVS          | not sequenced                 |
