# Supplementary material for: Genetic and phenotypic characterization of recently discovered enterovirus D type 111
Source: PubMed Central journal article supplement (PMC6818792; doi:10.1371/journal.pntd.0007797), 2019-10-17

**Visible**

**Fluorescence**

**L20B**

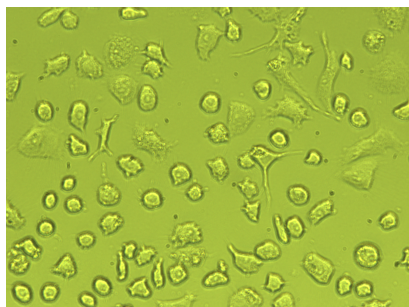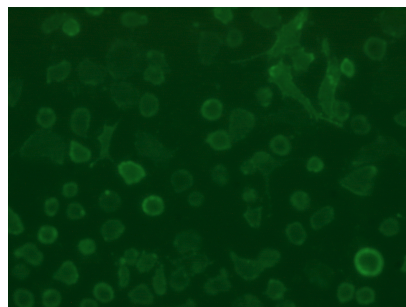

**RD**

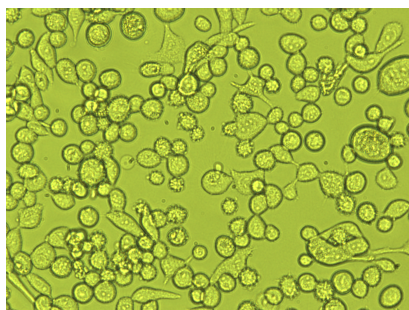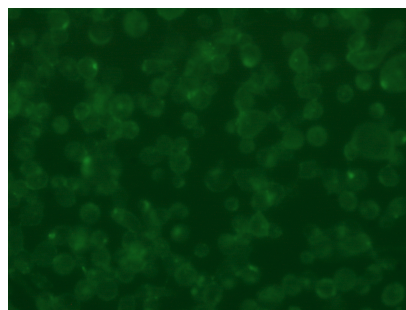

**L**

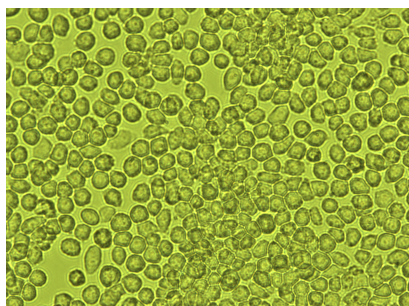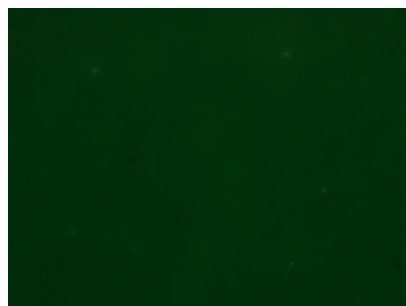

Supplement: pntd.0007797.s004.pdf [file pntd.0007797.s004.pdf]
